# Supplementary material for: An alternative, faster and simpler method for the formation of hierarchically porous ZnO particles and their thermoelectric performance
Source: Royal Society of Chemistry journal article supplement (doi:10.1039/c7ra05067d), 2017-01-01
Supplement: c7ra05067d1.pdf [file c7ra05067d1.pdf]

## Supporting Information

# An alternative, faster and simpler method for the formation of hierarchically porous ZnO particles and their thermoelectric performance

Raymond V.Rivera Virtudazo,<sup>a</sup> Quansheng Guo,<sup>a</sup> Rudder Wu,<sup>a</sup> Toshiaki Takei,<sup>b</sup> and Takao Mori\*<sup>a</sup>

<sup>a</sup>Thermal Energy Materials Group, WPI Center for Materials Nanoarchitectonics (MANA), National Institute for Materials Science (NIMS), Tsukuba, Ibaraki 305-0044 Japan

<sup>b</sup>RNFS/Nanofabrication Group, WPI Center for Materials Nanoarchitectonics (MANA), National Institute for Materials Science (NIMS), Tsukuba, Ibaraki 305-0044 Japan

\*corresponding author. TEL: +81-(0)29-860-4323 FAX: +81-(0)29-860-6280

\*E-mail: MORI.Takao@nims.go.jp

### ABBREVIATIONS

ZT, Figure of Merit; XRD, X-ray Diffraction; SPS, Spark Plasma Sintering; DSC, Differential Scanning Calorimetry; Cp, Heat Capacity; SEM, Scanning Electron Microscope; EDX, Energy Dispersive X-ray; RE, Rare Earth

Keywords:

Energy conversion; Materials science; Semiconductors; Thermoelectric materials

Typical reaction of ZnO:

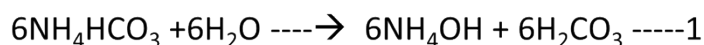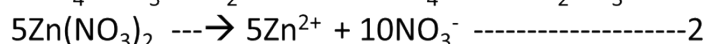

(1)+ (2) ideal case

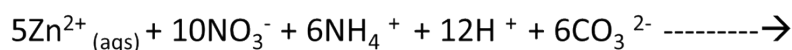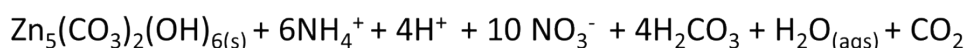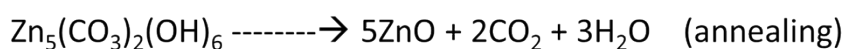

Fig.S1 Typical reaction for ZnO.

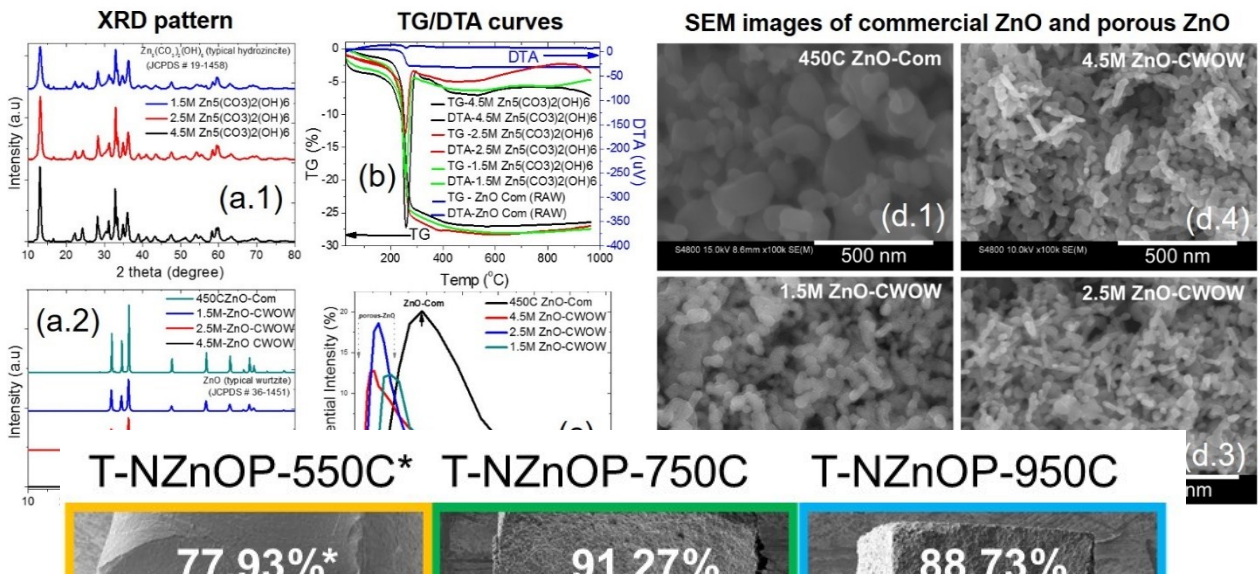

Fig.S2 (a) XRD pattern of (a.1)  $Zn_5(CO_3)_2(OH)_6$  and (a.2) NZnO powder (b) TG/DTA curves of as synthesized  $Zn_5(CO_3)_2(OH)_6$ , (c) PSD curves and (d) SEM images at different concentration with commercial ZnO powder (as reference).

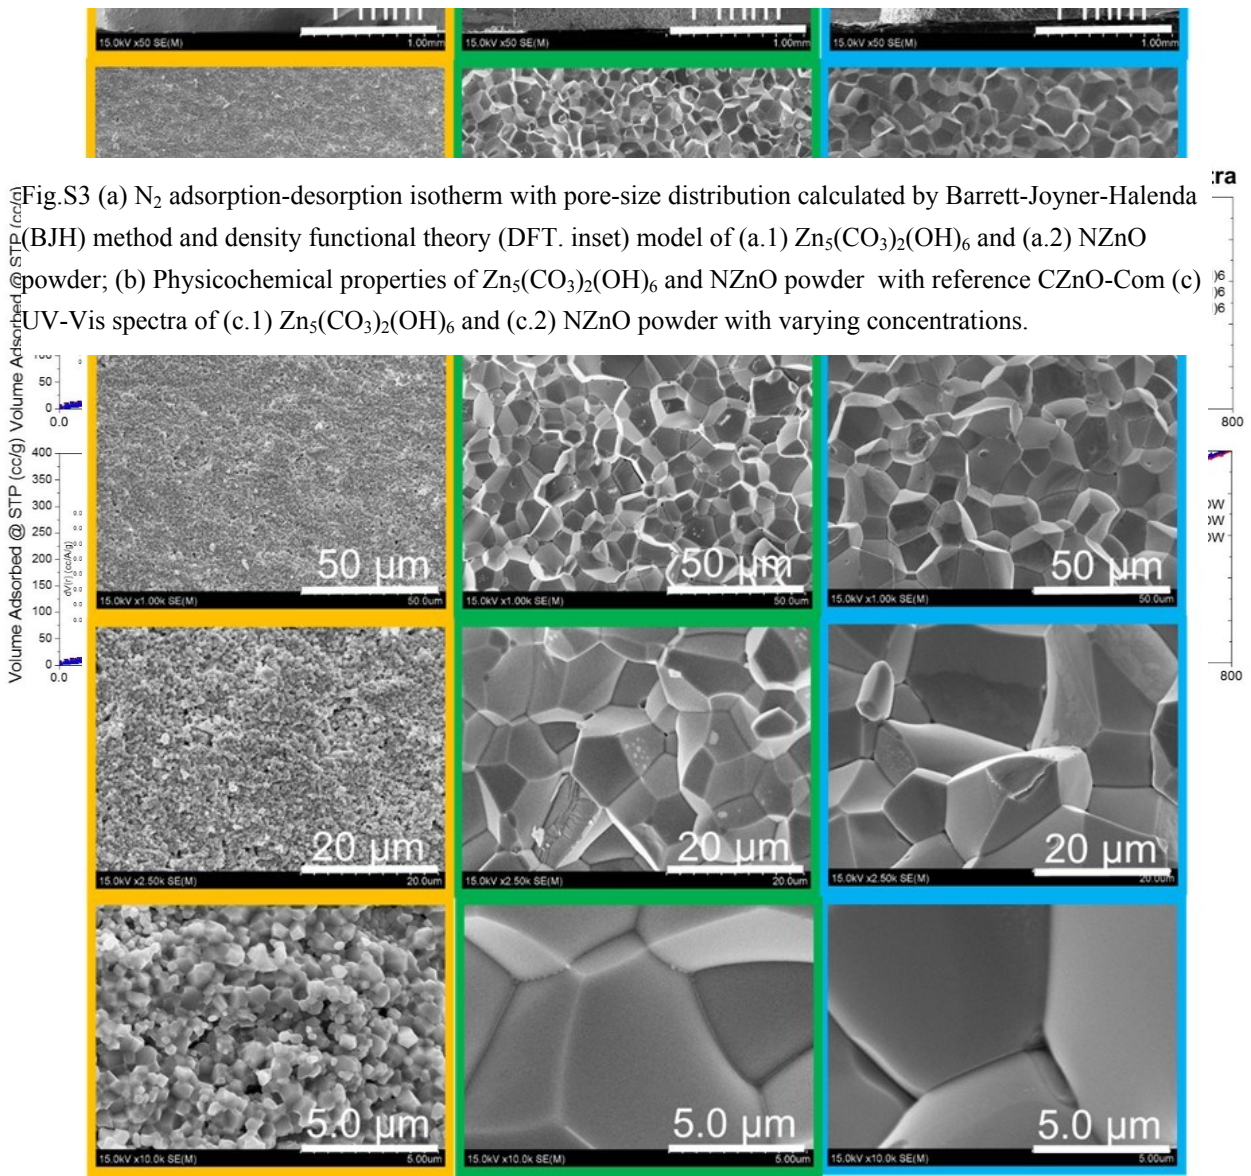

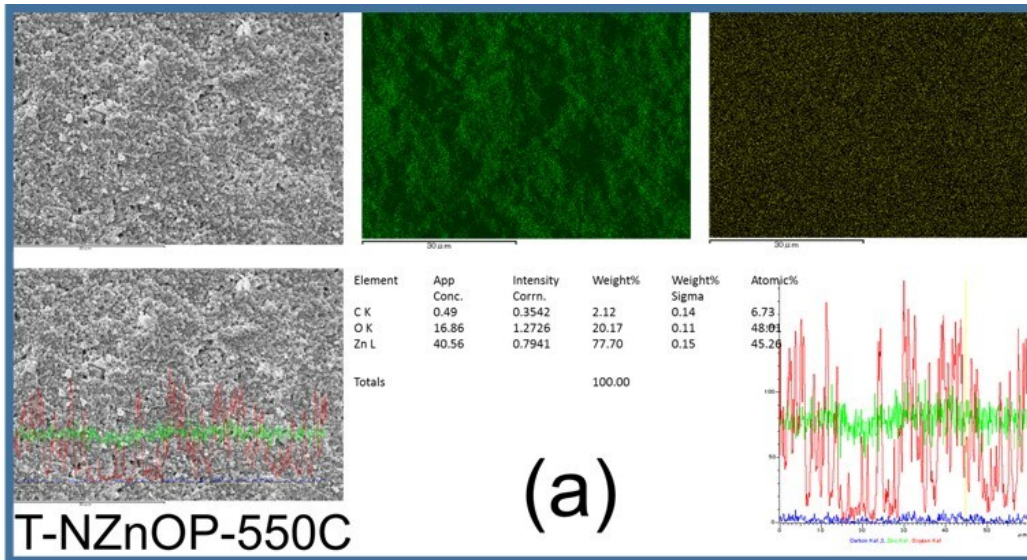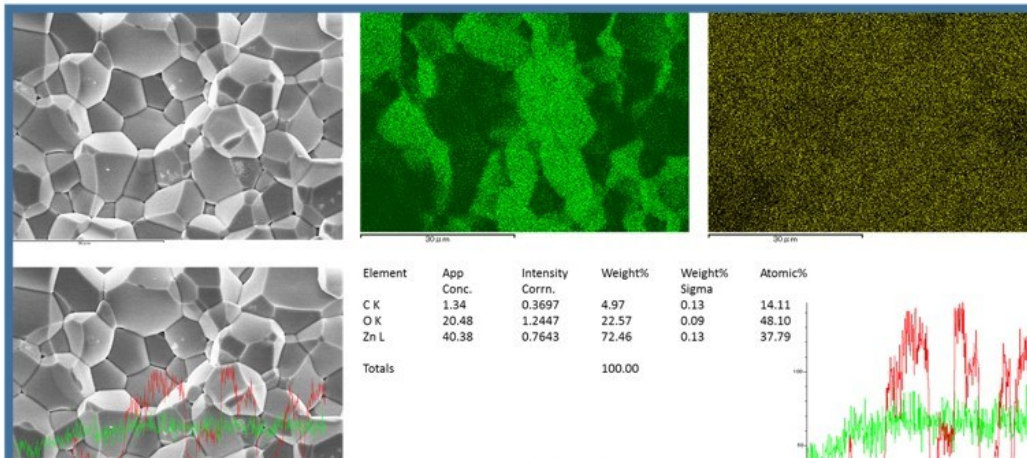

Fig.S4 Typical cross sectional area of sample pellets cut perpendicular to the applied pressure direction of low pressure spark plasma sintering (SPS) (2.2~2.8KN), for determining the thermoelectric properties.

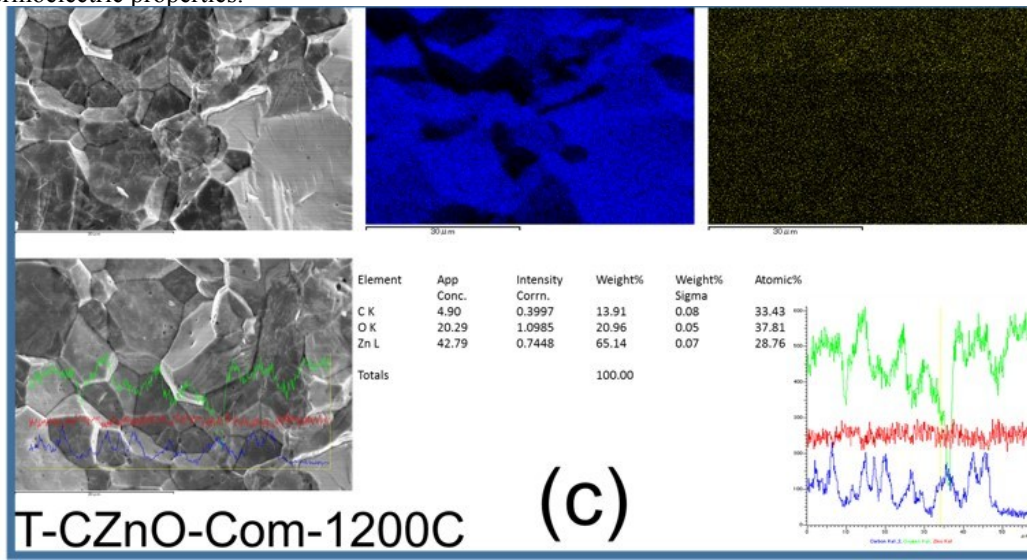

Fig.S5 Typical EDX analysis of (a,b) T-NZnOP series at varying sintering temperature with (c) T-CZnO-Com-1200C as reference.

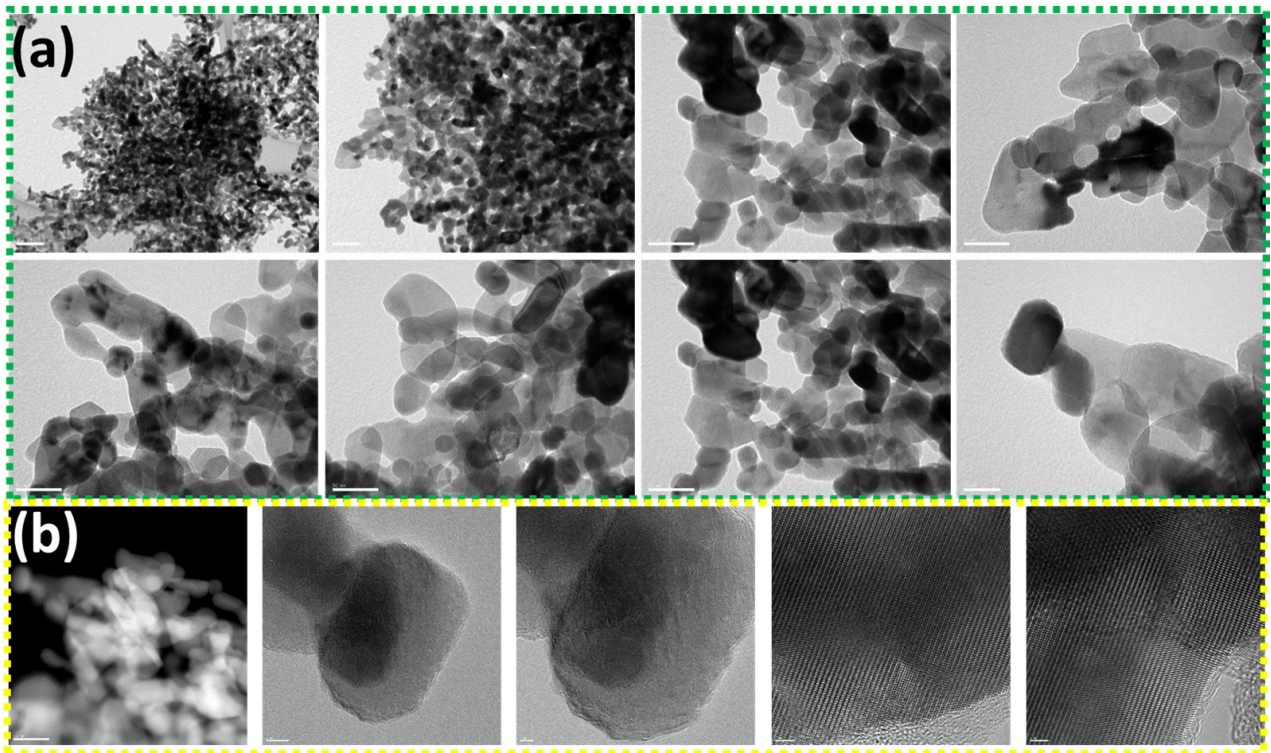

Fig.S6 (a) Series of TEM micrographs and (b) series of HR-TEM.

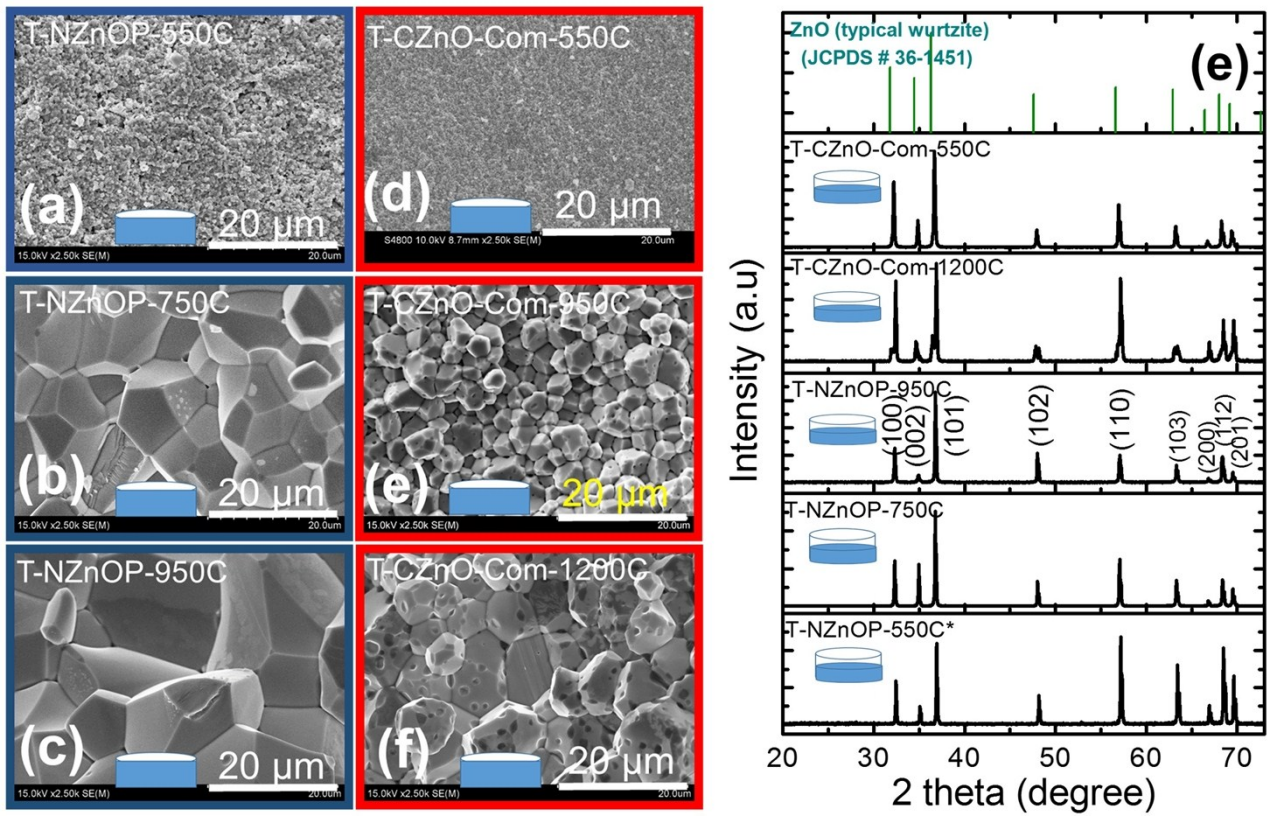

Fig.S7 Typical SEM micrograph images of the cross-sectional area of sample pellets of (a,b,c) T-NZnOP and (d,e,f) T-CNZnO-Com with (e) XRD pattern in different sintering temperature using low pressure SPS.

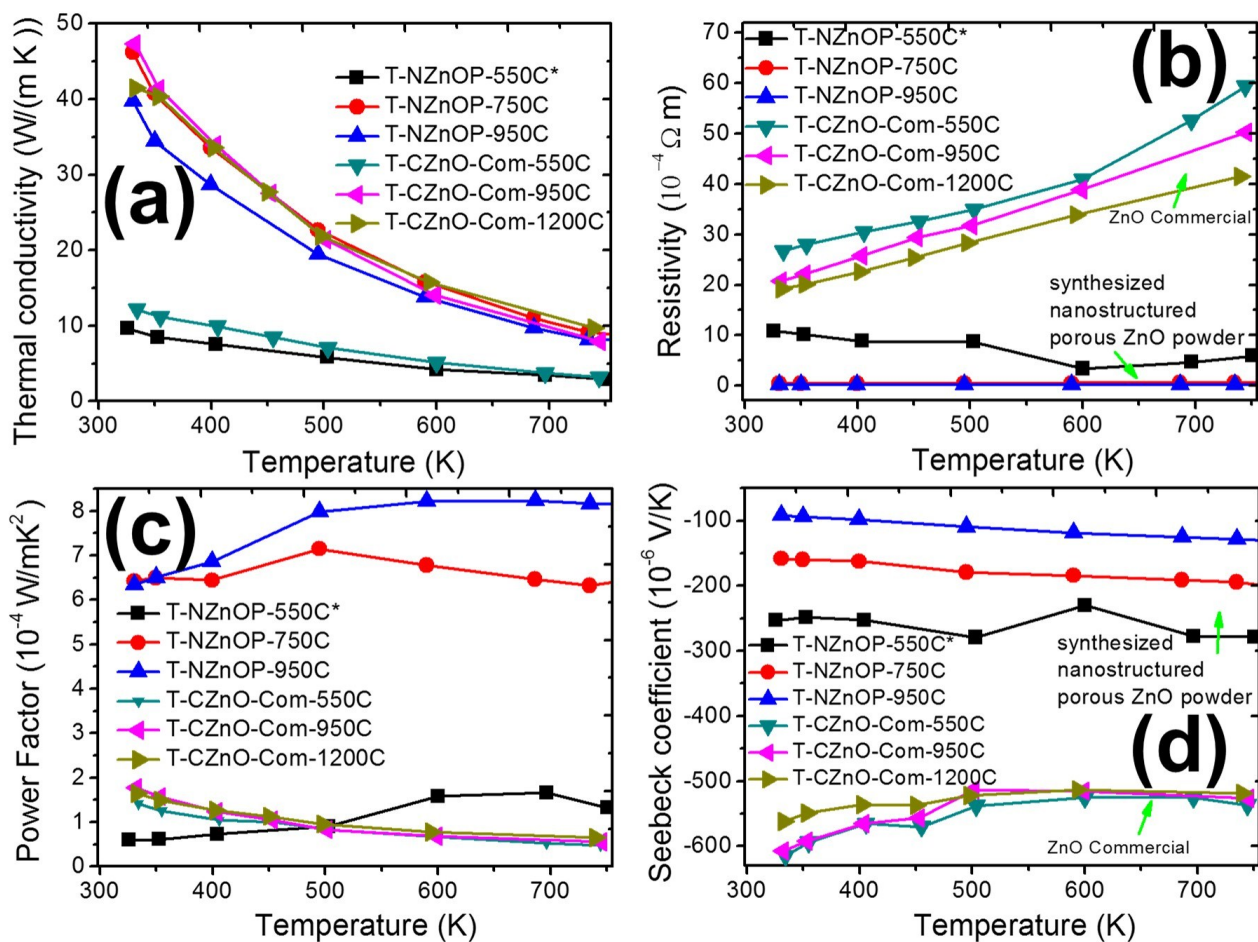

Fig.S8 Temperature-dependence of (a) thermal conductivity, (b) electrical resistivity, (c) Seebeck coefficient and (d) calculated powder factor for T-NZnOP and T-CZnO-Com series done after low pressured spark plasma sintering in Ar atmosphere.

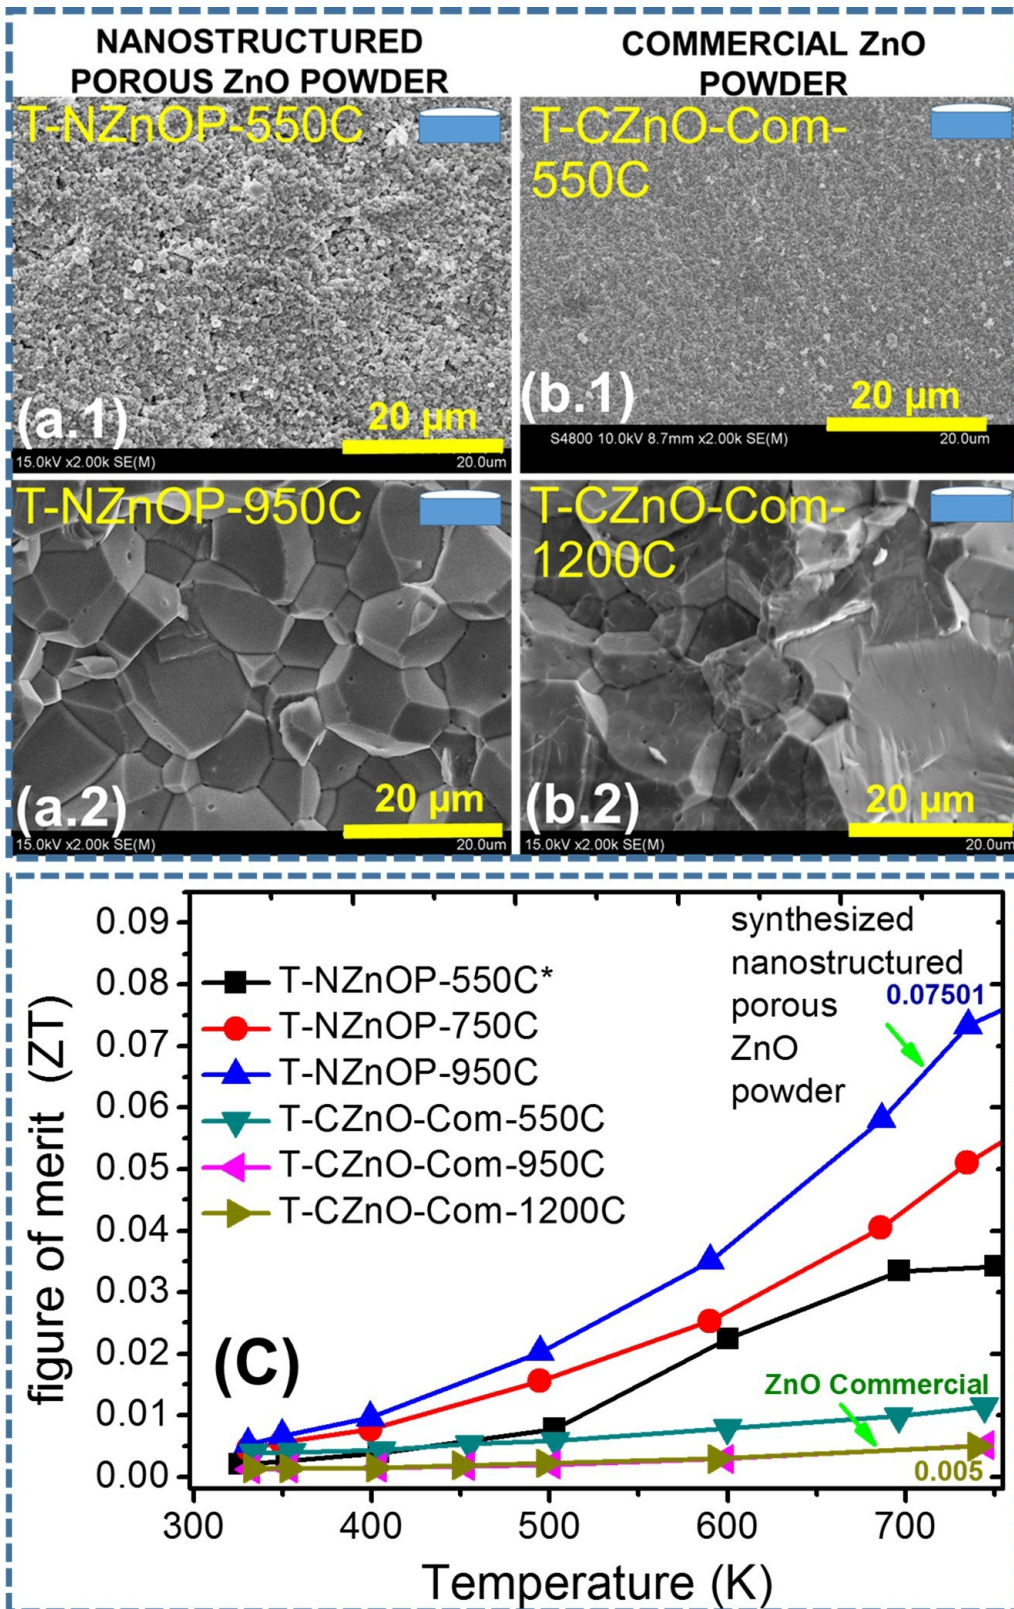

Fig.S9 Typical SEM micrograph cross sectional micrograph images with (c) Temperature-dependence of dimensionless figure of merit ( $ZT$ ) of (a.1, a.2) T-NZnOP and (b.1, b.2) T-CZnO-Com.

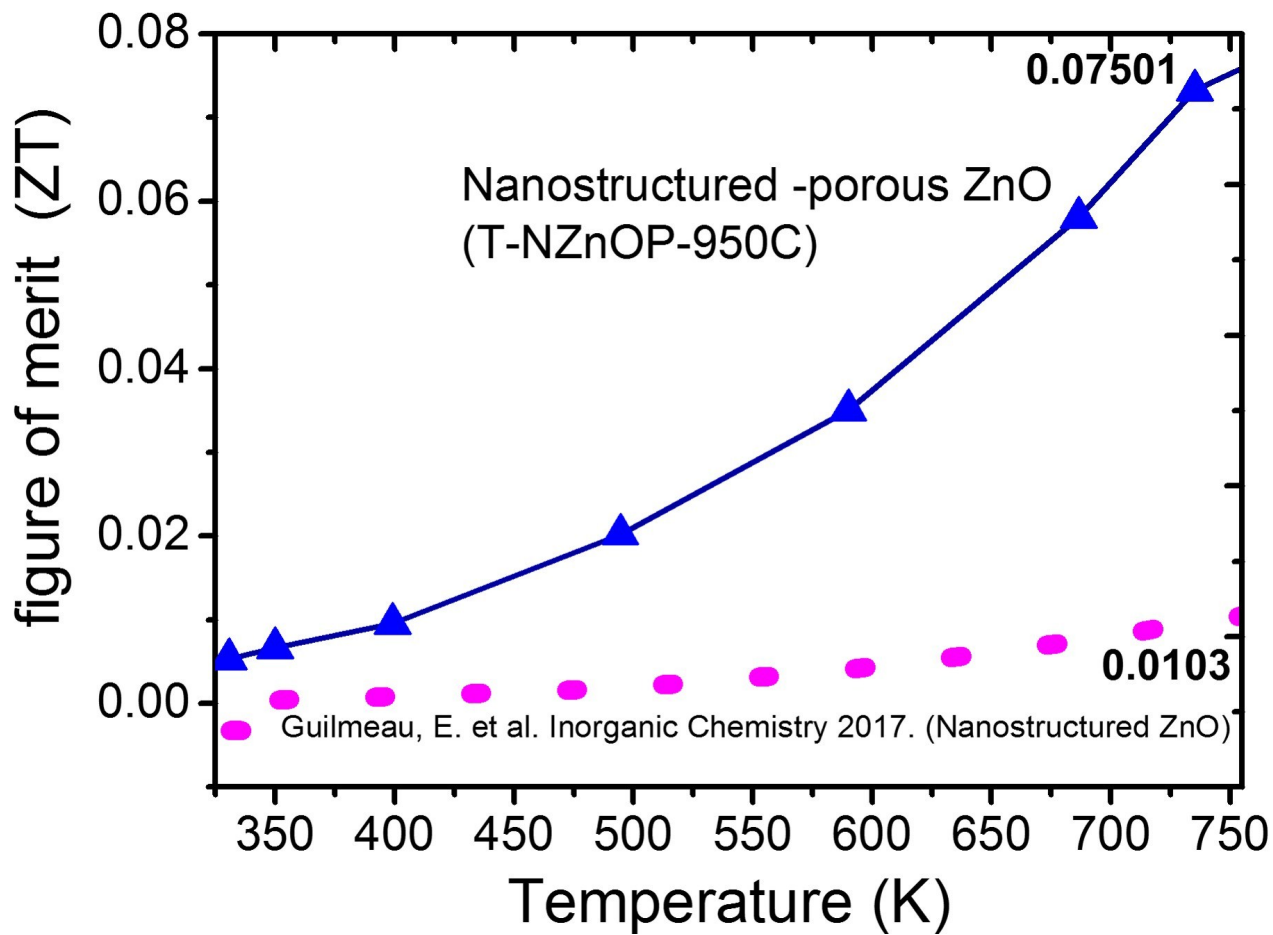

Fig.S10 Temperature-dependence of dimensionless figure of merit ( $ZT$ ) of T-NZnOP-950C and referred (scaled based from Ref.7) ZnO-nanostructured data.
